# Supplementary material for: Decoupling grain growth from densification during sintering of oxide nanoparticles
Source: Royal Society of Chemistry journal article supplement (doi:10.1039/c5ra27844a), 2016-01-01
Supplement: c5ra27844a1.pdf [file c5ra27844a1.pdf]

### Supporting Information

**Table S1.** List of types of nanoparticles used in the study

|                         | ZnO                     | BaTiO <sub>3</sub>           | CuO                               | SnO <sub>2</sub> | TiO <sub>2</sub>                   | Fe <sub>2</sub> O <sub>3</sub><br>(spherical<br>shape) | Fe <sub>2</sub> O <sub>3</sub><br>(rhombohedral<br>shape) |
|-------------------------|-------------------------|------------------------------|-----------------------------------|------------------|------------------------------------|--------------------------------------------------------|-----------------------------------------------------------|
| d <sub>xrd</sub> [nm]   | 20                      | 20                           | 29<br>(tenorite)                  | 19               | 28<br>(anatase)                    | 55                                                     | 52                                                        |
| synthesis <sup>*)</sup> | CP                      | HT                           | CP                                | CP               | CP                                 | HT                                                     | HT                                                        |
| note                    | 0.03 at%<br>Ga<br>doped | pseudo<br>cubic<br>structure | tenorite<br>with minor<br>cuprite | cassiterite      | anatase<br>with<br>minor<br>rutile | hematite                                               | hematite                                                  |

<sup>\*)</sup> CP: commercial powder, HT: hydrothermal synthesis

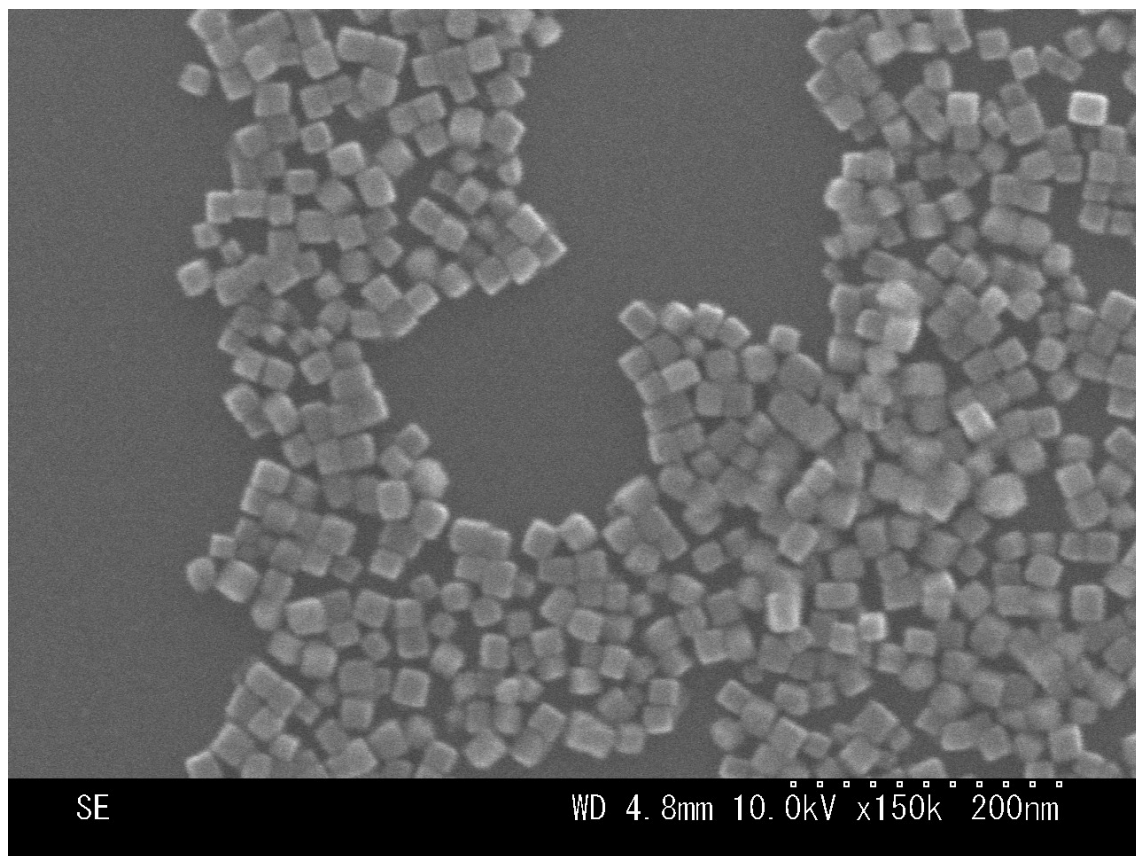

**Figure S1.** SEM image of BaTiO<sub>3</sub> NPs with cubic shape.

# Pressure sintering of ZnO microcrystals as control

A ZnO powder with micro-sized (*i.e.*, 1  $\mu\text{m}$ ) crystals (3N grade, Koujundo Chemical Laboratory Co., Ltd.) was densified under a pressure of 500 MPa. The heating/cooling rate used was 50°C/min, and the temperature was kept at 300°C for 5 min. The density of the resultant product was 85% of the theoretical density; in comparison, sintered ZnO nanoparticles exhibited a density of more than 95%.

The density of the microcrystals was higher than the close-packing density. Thus, it is likely that the densification occurred because of yield deformation. According to Helle *et al.*, the relationship between the yield stress ( $\rho_{\text{yield}}$ ) and the density is as follows:

$$\rho_{\text{yield}} = \left( \frac{(1 - \rho_0)P}{1.3\sigma_y} + \rho_0^3 \right)^{1/3}$$

where  $\sigma_y$  is the yield stress and  $\rho_0$  is the density in the absence of pressure ( $P$ ).<sup>13</sup> The equation is valid for  $\rho_{\text{yield}} < 0.9$ . The trend observed is shown in Fig. S2.

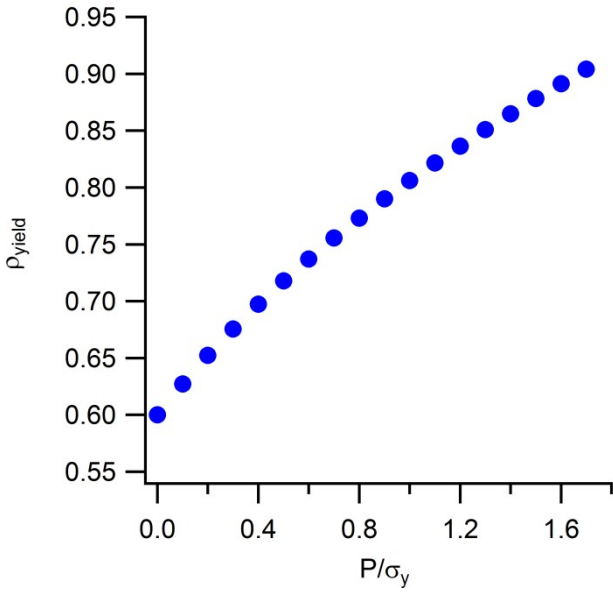

**Figure S2.** Densification by yield deformation.

From the figure, it can be seen that an external pressure comparable to the yield stress results in a density of 0.85. On the other hand, the yield stress of ZnO at 300°C had been determined to be of the order of 100 MPa<sup>14</sup>. Hence, an applied pressure of 500 MPa is enough to explain the phenomenon of densification by yield stress.

## Peak shift of shrinkage rate against various heating rates of NPs above the temperature of LTD mode

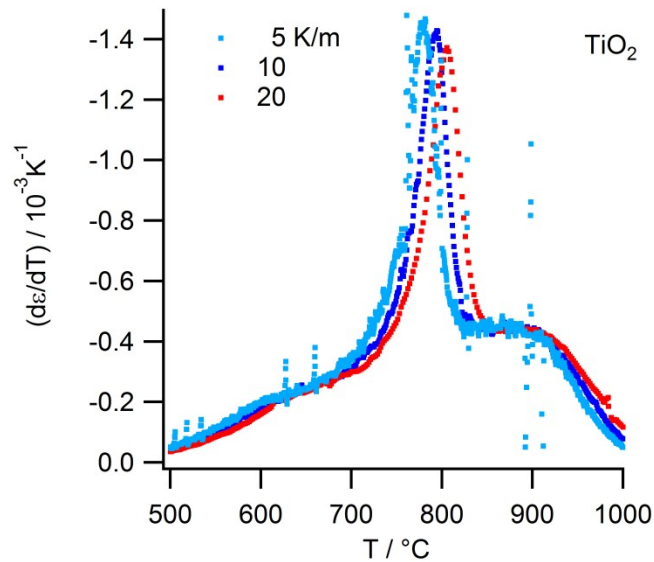

The figure shows the peak of shrinkage rate for nano-TiO<sub>2</sub> at relatively high temperature.

Although the peak shift was not evident for LTD (See Fig.8 in the manuscript), clear peak shift against heating rate was observed similar to the nano-ZnO. This peak shift is principally caused by the activation energy of diffusion during sintering. The same phenomenon is reported in the literatures regarding nano-particle-sintering of oxides. [i-iii]

i) K. G. Ewsuk, D. T. Ellerby and C. B. DiAntonio, *J. Am. Ceram. Soc.*, 2006, **89**, 2003.

ii) M. Mazaheri, A. Simchi, M. Dourandish, and F. Golestani-Fard, *Ceramics International*, 2009, **35**, 547.

iii) Y. Kinemuchi and K. Watari, *J. Euro. Ceram. Soc.*, 2008, **28**, 2019.
